# Supplementary material for: Voltammetric Sensor Based on the Combination of Tin and Cerium Dioxide Nanoparticles with Surfactants for Quantification of Sunset Yellow FCF
Source: MDPI journal article supplement (doi:10.3390/s24030930), 2024-01-31
Supplement: s1 [file s1]

## Supplementary Materials

### Voltammetric Sensor Based on the Combination of Tin and Cerium Dioxide Nanoparticles with Surfactants for Quantification of Sunset Yellow FCF

Liliya Gimadutdinova, Guzel Ziyatdinova\* and Rustam Davletshin

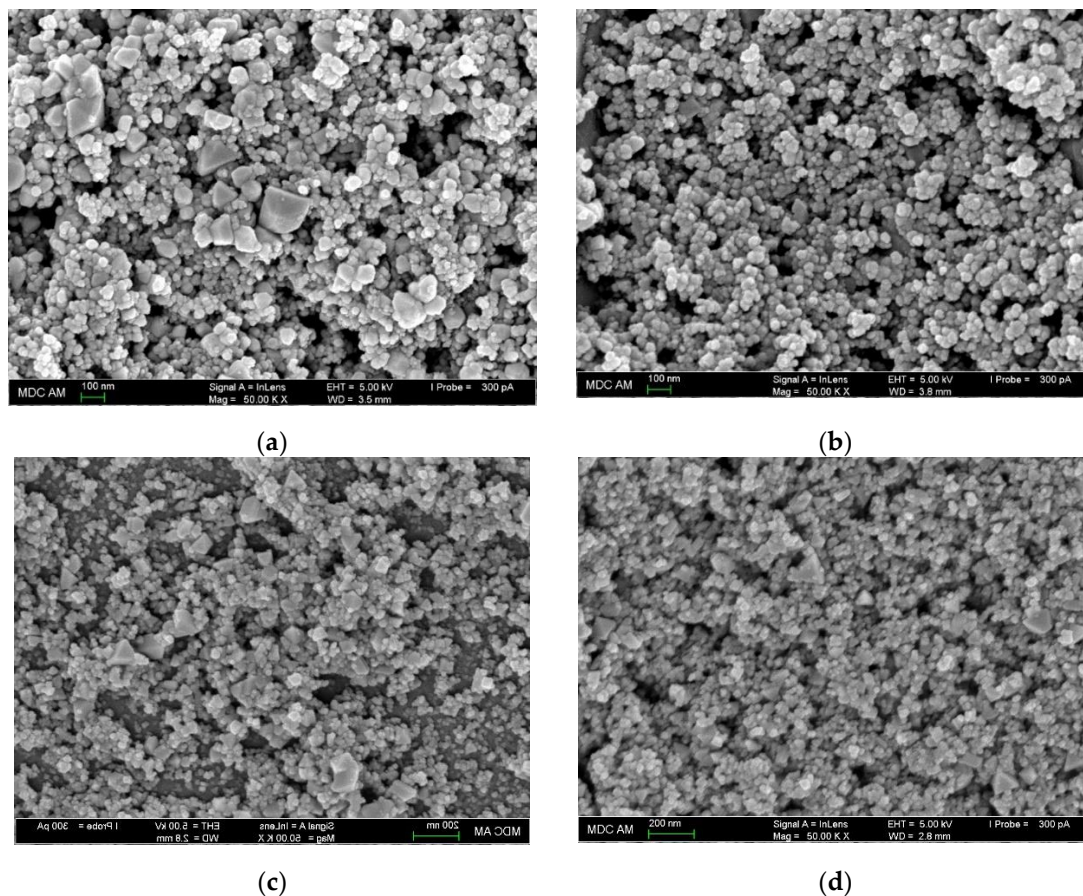

**Figure S1.** Field emission scanning electron microscopy images of the electrode surface: (a) GCE//SnO<sub>2</sub> NPs; (b) GCE/SnO<sub>2</sub> NPs-HDPB; (c) GCE/CeO<sub>2</sub> NPs; (d) GCE/CeO<sub>2</sub> NPs-HDPB. Magnification is 50,000 $\times$ .

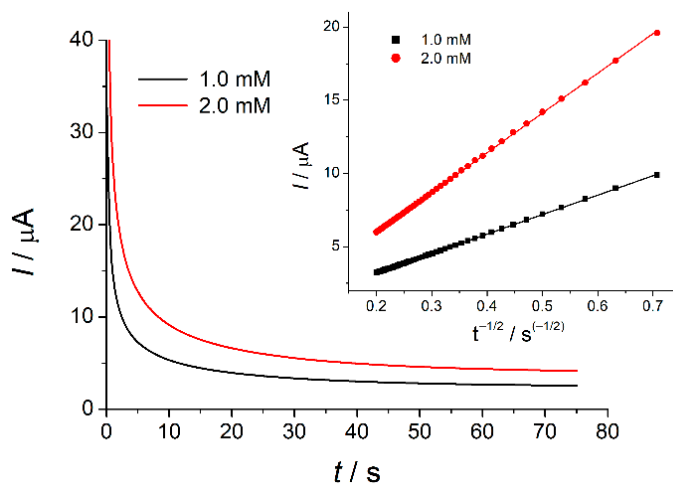

**Figure S2.** Chronoamperograms of hexacyanoferrate(II) ions in 0.1 M KCl on the bare GCE at 450 mV. The inset is the plot of  $I$  vs.  $t^{-1/2}$ .

Diffusion coefficient has been calculated from the Equation S1

$$I_{p_{ox}} = \pi^{1/2} \chi(bt) n F A c D^{1/2} \left( \frac{\alpha_a n_a F}{RT} \right)^{1/2} v^{1/2} \quad (S1)$$

where  $I_{ox}$  – oxidation peak current (A),  $\chi(bt)$  – normalized current for sweep experiments with an irreversible system,  $n$  – the number of electrons participating in oxidation,  $F$  – the Faraday constant ( $C \text{ mol}^{-1}$ ),  $A$  – the electrode surface area ( $\text{cm}^2$ ),  $c$  – concentration ( $\text{mol cm}^{-3}$ ),  $D$  – diffusion coefficient ( $\text{cm}^2 \text{ s}^{-1}$ ),  $\alpha_a$  – anodic transfer coefficient,  $n_a$  – the number of electrons involved in the rate-determining step,  $R$  – the gas constant ( $J \text{ mol}^{-1} \text{ K}^{-1}$ ),  $T$  – temperature (K) and  $v$  – potential scan rate ( $V \text{ s}^{-1}$ ).

The standard heterogeneous electron transfer rate constant  $k^0$  has been calculated using Equation S2

$$k^0 = 2.415 e^{-\frac{0.02F}{RT}} D^{1/2} (E_p - E_{p1/2})^{-1/2} v^{1/2} \quad (S2)$$

where  $k^0$  is the standard heterogeneous electron transfer rate constant ( $\text{cm s}^{-1}$ ),  $D$  – diffusion coefficient ( $\text{cm}^2 \text{ s}^{-1}$ ),  $E$  – the oxidation potential (V),  $E_{1/2}$  – the oxidation half-wave potential (V), other symbols have the same meaning as in Equation S2.

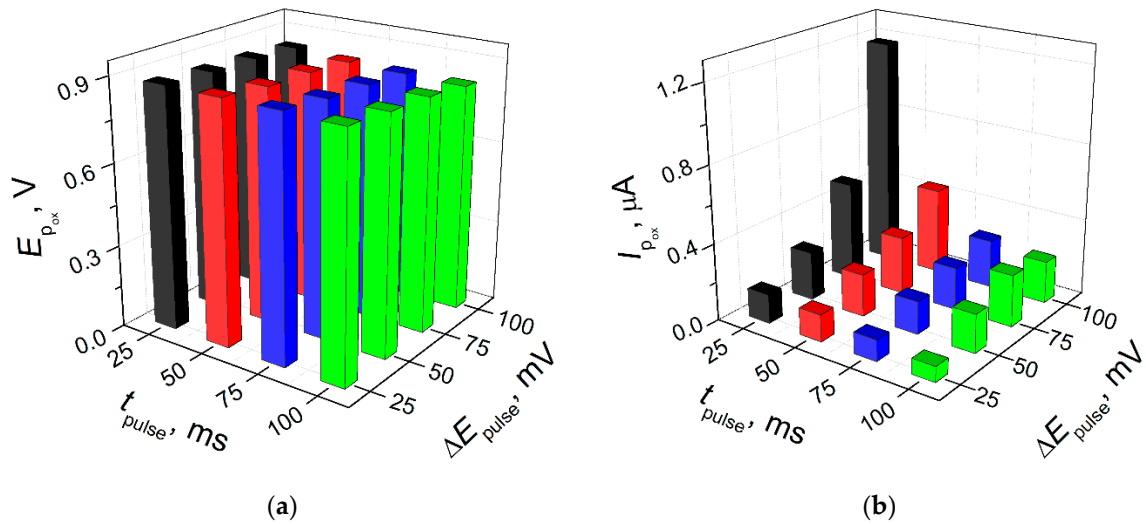

**Figure S3.** Effect of pulse parameters on the voltammetric characteristics of 1.0 μM SY FCF at the GCE/SnO<sub>2</sub>-CeO<sub>2</sub> NPs-HDPB in BRB pH 2.0: (a) the changes in the oxidation peak potential; (b) the changes in the oxidation peak currents.  $v = 0.010 \text{ V s}^{-1}$ .

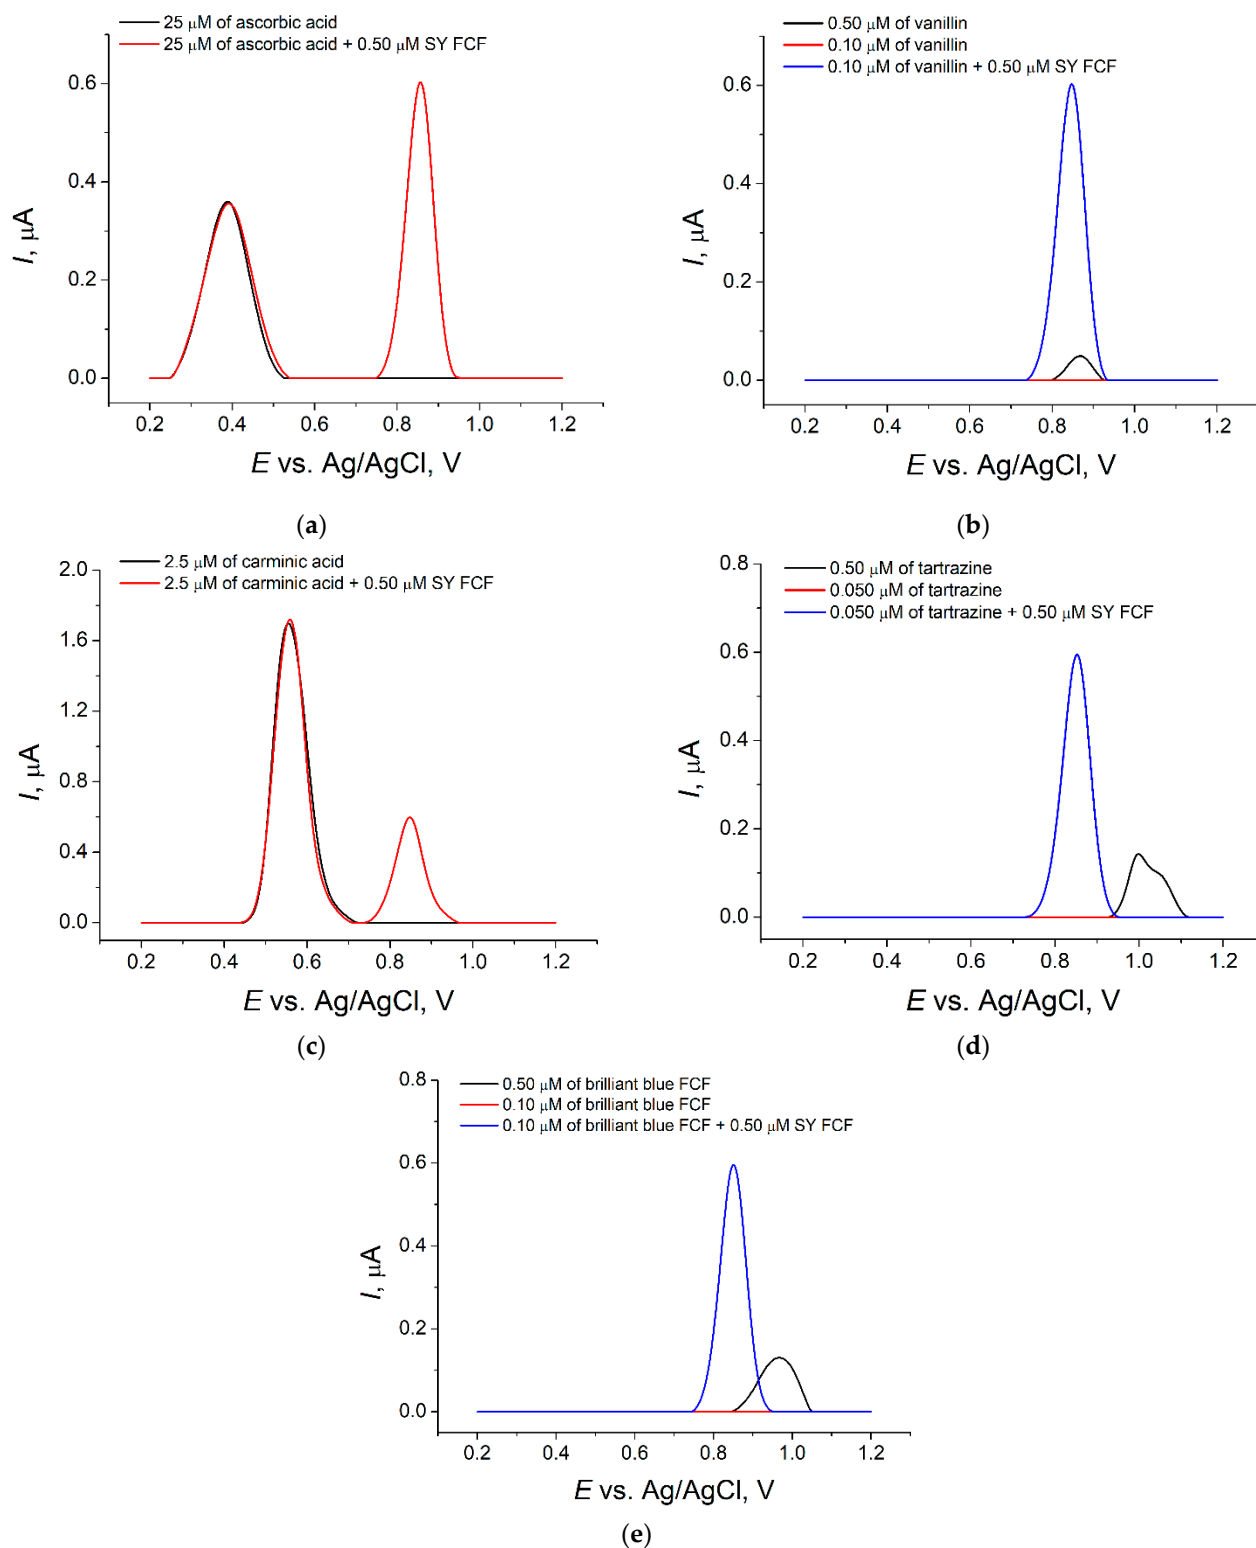

**Figure S4.** Baseline-corrected differential pulse voltammograms of interferences and their mixtures with SY FCF at the GCE/SnO<sub>2</sub>-CeO<sub>2</sub> NPs-HDPB in BRB pH 2.0: (a) ascorbic acid; (b) vanillin; (c) carminic acid; (d) tartrazine; (e) brilliant blue FCF. Pulse amplitude is 100 mV, pulse time is 25 ms, potential scan rate is 0.010 V s<sup>-1</sup>.

**Table S1.** Recovery of SY FCF in soft drinks ( $n = 5$ ;  $P = 0.95$ ).

| Sample   | Spiked, nM | Found, nM   | RSD, % | R, %           |
|----------|------------|-------------|--------|----------------|
| Sample 1 | 0          | $100 \pm 5$ | 4.3    |                |
|          | 50         | $150 \pm 6$ | 3.1    | $100 \pm 4$    |
|          | 100        | $201 \pm 4$ | 1.7    | $101 \pm 2$    |
| Sample 2 | 0          | $176 \pm 3$ | 1.2    |                |
|          | 90         | $266 \pm 6$ | 1.9    | $100 \pm 2$    |
|          | 170        | $345 \pm 3$ | 0.55   | $99.8 \pm 0.9$ |
| Sample 3 | 0          | $31 \pm 1$  | 3.5    |                |
|          | 16         | $47 \pm 2$  | 3.1    | $100 \pm 4$    |
|          | 31         | $62 \pm 1$  | 1.4    | $100 \pm 2$    |
